# Supplementary material for: Novel three-dimensional flower-like porous Al2O3 nanosheets anchoring hollow NiO nanoparticles for high-efficiency lithium ion batteries
Source: Royal Society of Chemistry journal article supplement (doi:10.1039/c6ta04323b), 2016-01-01
Supplement: c6ta04323b1.pdf [file c6ta04323b1.pdf]

Supporting Information

**Novel Three-dimensional Flower-like Porous Al<sub>2</sub>O<sub>3</sub> Nanosheets Anchoring  
hollow NiO Nanoparticles for High-efficiency Lithium Ion Battery**

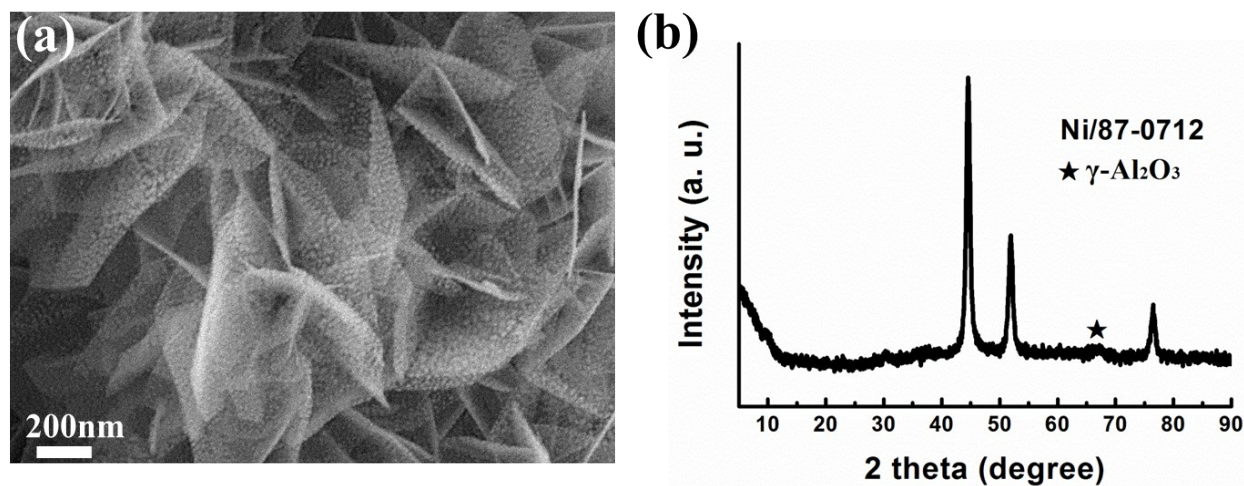

**Figure S1** (a) SEM image and (b) XRD pattern of FH-Ni@Al<sub>2</sub>O<sub>3</sub>.

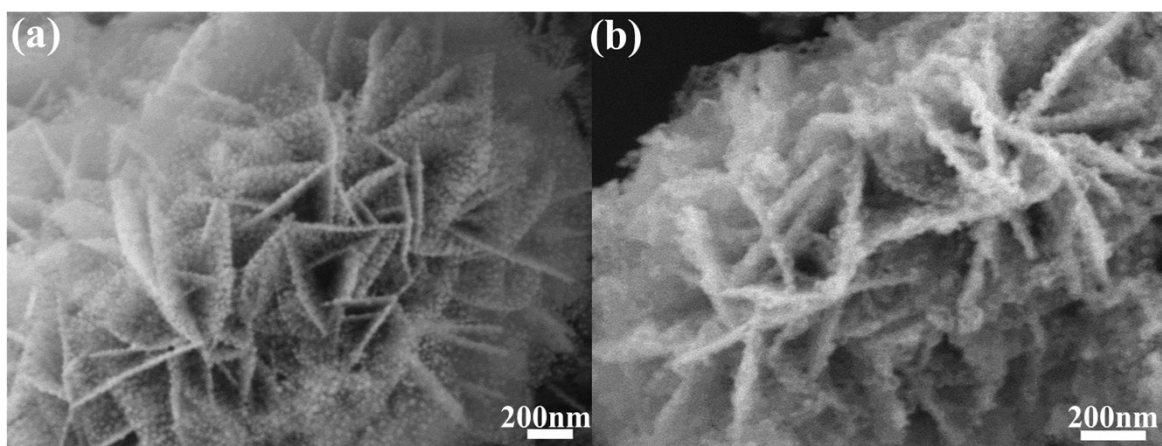

**Figure S2 SEM images of flower-like Ni@Al<sub>2</sub>O<sub>3</sub> synthesized at (a) 250 and (b) 450 °C, respectively.**

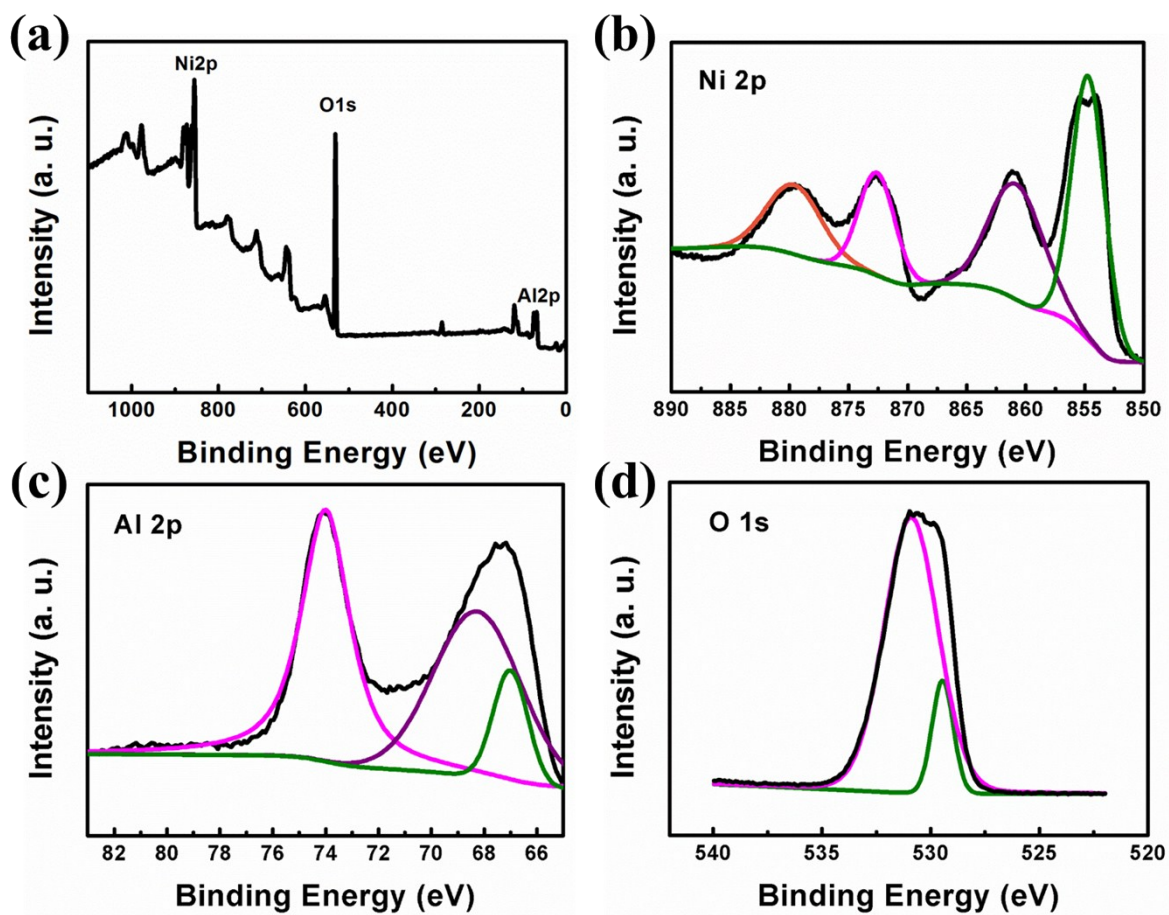

**Figure S3** XPS of FH-NiO@Al<sub>2</sub>O<sub>3</sub>. (a) The whole spectrum from 1100-0 eV. (b), (c) and (d) are the XPS spectra of Ni 2p, Al 2p and O 1s, respectively.

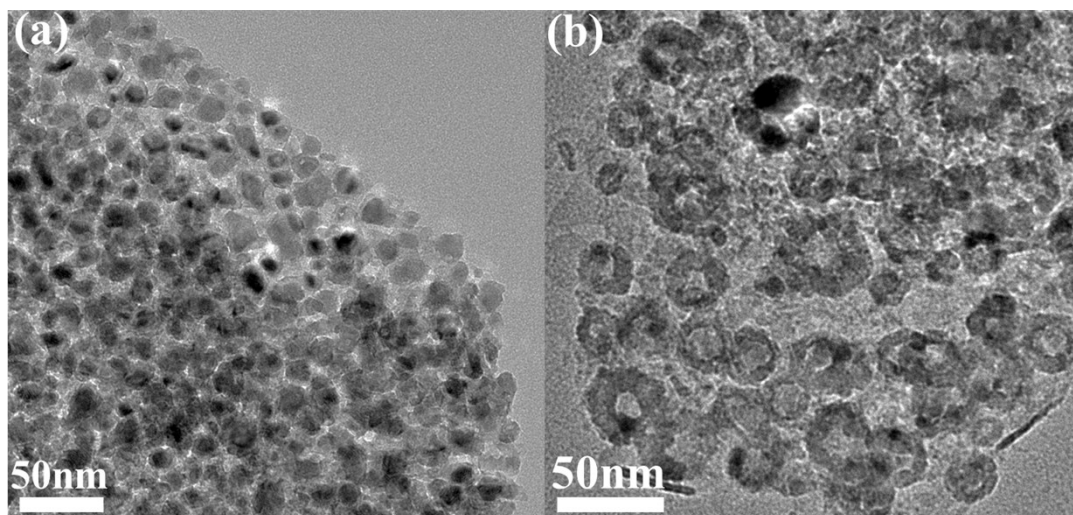

**Figure S4** TEM images of (a) F-Ni@Al<sub>2</sub>O<sub>3</sub>-250 and (b)F-Ni@Al<sub>2</sub>O<sub>3</sub>-450.

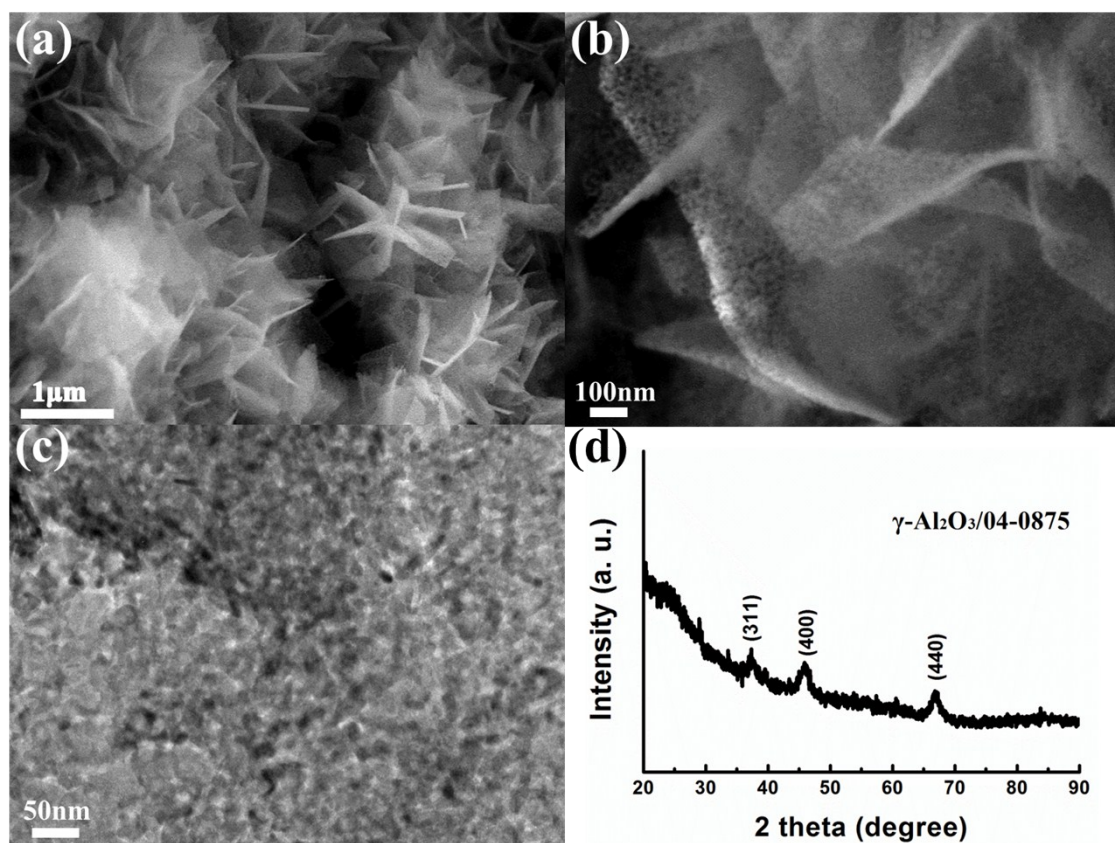

**Figure S5** (a) and (b) SEM images of flower-like  $\text{Al}_2\text{O}_3$  nanosheets after dissolution by 1 M HCl. (c) TEM image and (d) XRD pattern of flower-like  $\text{Al}_2\text{O}_3$  nanosheets.

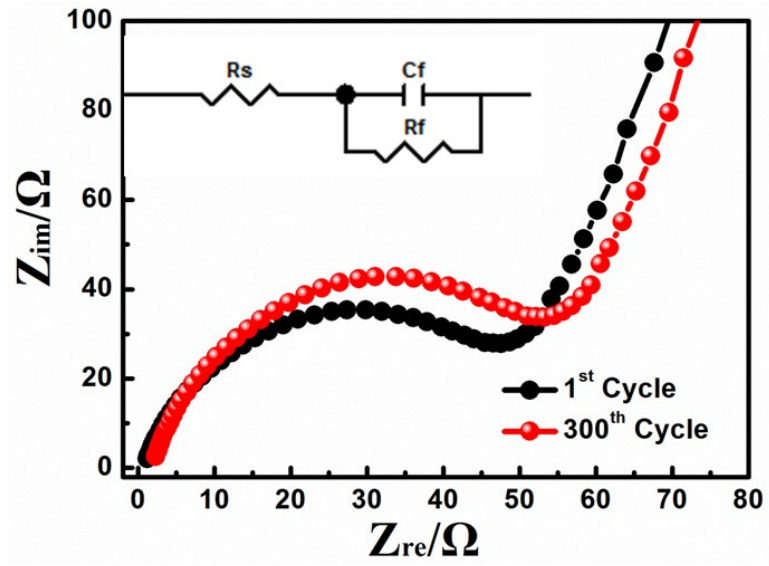

**Figure S6** Nyquist plots of FH-NiO@Al<sub>2</sub>O<sub>3</sub> before and after running for 300 cycles.

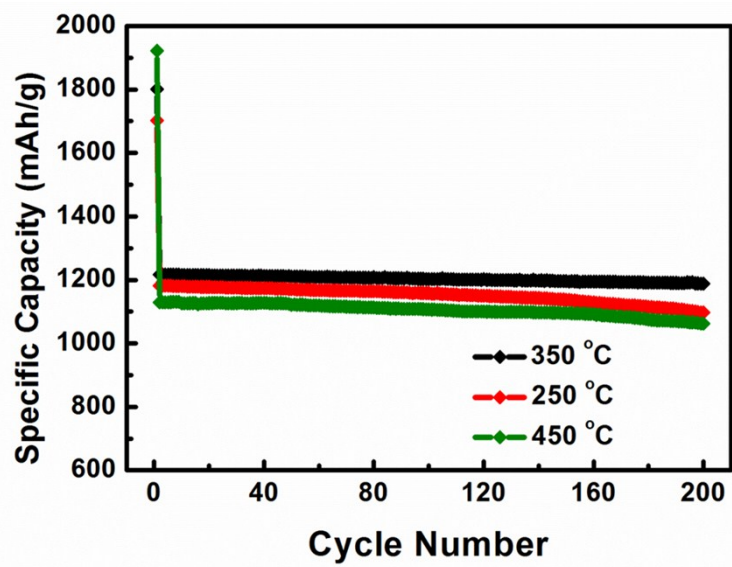

**Figure S7** Galvanostatic charge/discharge curves of flower-like NiO@Al<sub>2</sub>O<sub>3</sub> prepared at different temperatures at the current density of 500 mA/g.

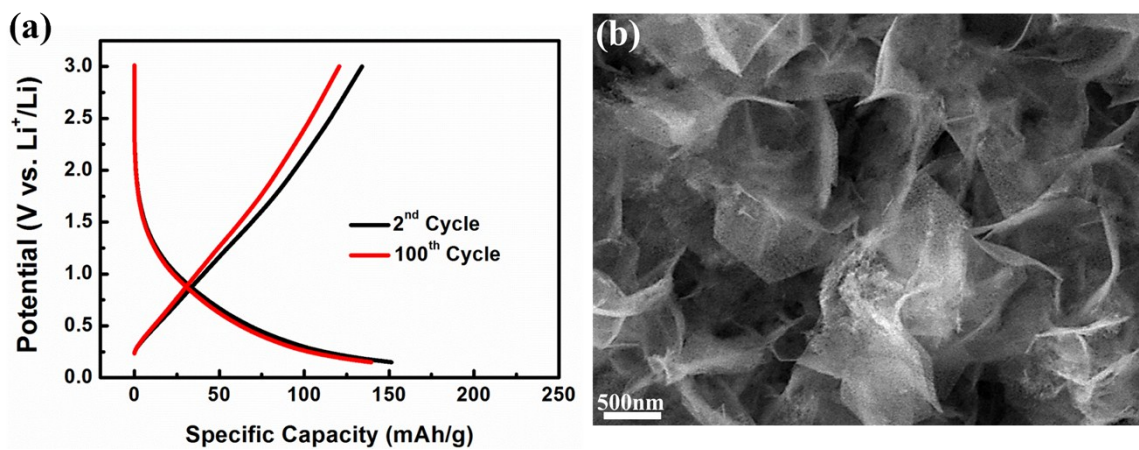

**Figure S8** (a) Galvanostatic charge/discharge curves at the current density of 100 mA/g for 100 cycles. (b) SEM image of flower-like Al<sub>2</sub>O<sub>3</sub> nanosheets after 100 cycles.



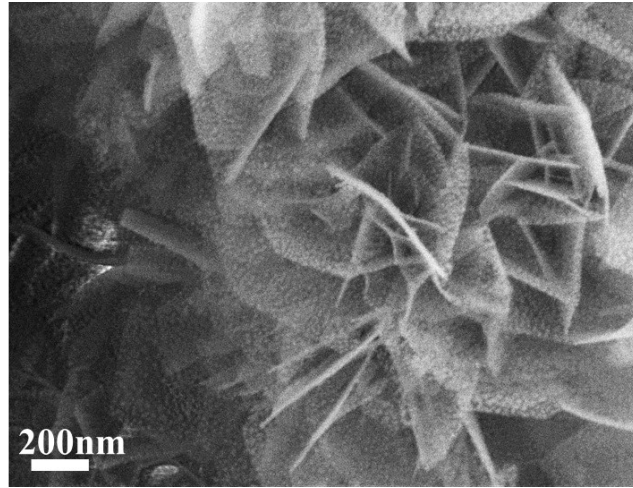

**Figure S9** SEM image of FH-NiO@Al<sub>2</sub>O<sub>3</sub> after running for 300 cycles.

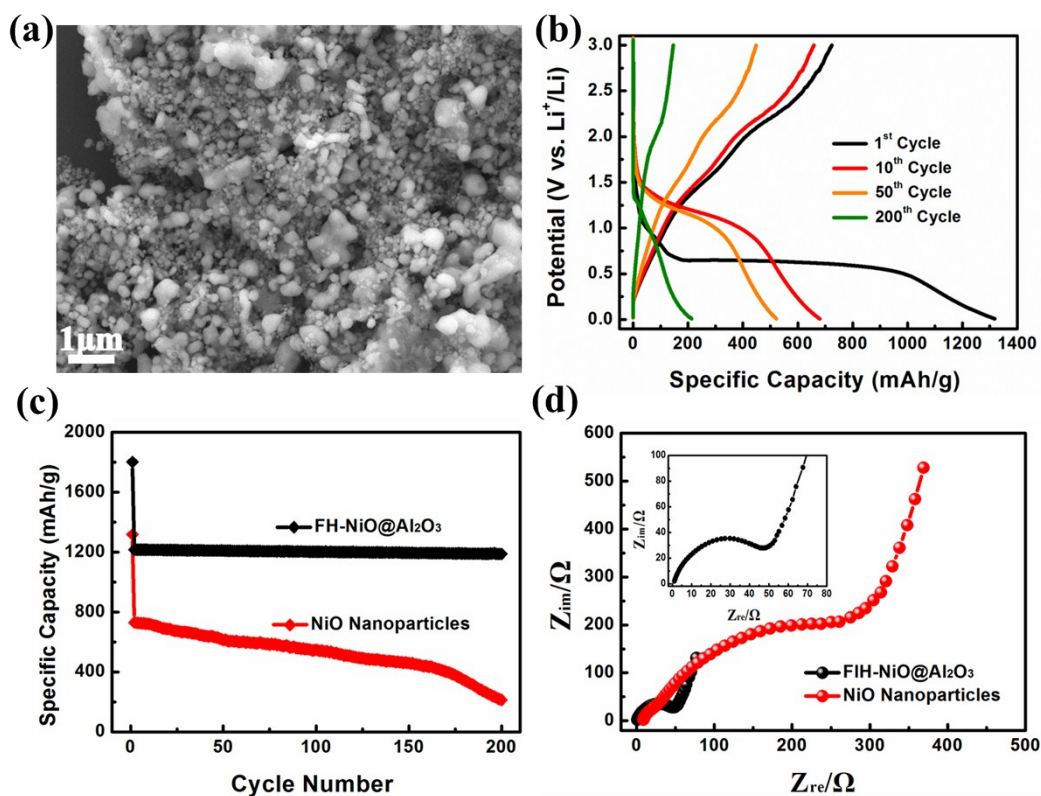

**Figure S10** (a) SEM image of NiO nanoparticles without Al<sub>2</sub>O<sub>3</sub>. (b) Galvanostatic charge/discharge curves of NiO nanoparticles at the current density of 500 mA/g for 200 cycles. (c) Cyclic test and (d) EIS measurement of both FH-NiO@Al<sub>2</sub>O<sub>3</sub> and NiO nanoparticles for comparison.
